# Supplementary material for: Pectin methylesterase activity is required for RALF1 peptide signalling output
Source: eLife. 2024 Oct 3;13:RP96943. doi: 10.7554/eLife.96943 (PMC11449480; doi:10.7554/eLife.96943)
Supplement: Figure 1—source data 3. [file elife-96943-fig1-data3.xlsx]

## Sheet: Sheet1
control	EC	EGCG
26.9537	27.1167	14.9786
27.67	28.6225	15.6047
24.0287	31.8914	11.5439
25.775	27.435	21.4035
25.055	31.102	10.109
32.5875	31.2712	17.8451
29.1725	24.3914	12.7971
31.2014	30.546
30.54	26.1013
	25.8517
	25.964
