# Supplementary material for: Pectin methylesterase activity is required for RALF1 peptide signalling output
Source: eLife. 2024 Oct 3;13:RP96943. doi: 10.7554/eLife.96943 (PMC11449480; doi:10.7554/eLife.96943)
Supplement: Figure 1—source data 4. [file elife-96943-fig1-data4.xlsx]

## Sheet: Sheet1
Col-0	PMEI3-OE
25.06	19.7483
27.4983	17.4438
28.8358	23.9078
35.0664	19.4795
24.0943	19.2951
27.0637	15.5785
36.1916	20.3568
40.9532	21.7008
30.7258	23.9983
