# Supplementary material for: Pectin methylesterase activity is required for RALF1 peptide signalling output
Source: eLife. 2024 Oct 3;13:RP96943. doi: 10.7554/eLife.96943 (PMC11449480; doi:10.7554/eLife.96943)
Supplement: Figure 2—source data 1. [file elife-96943-fig2-data1.xlsx]

## Sheet: Sheet1
Col-0		fer-4
control	RALF1	control	RALF1
0.361	2.813	0.349	0.335
0.409	2.755	0.381	0.376
0.399	2.337	0.345	0.362
0.381	3.049	0.376	0.308
0.33	2.17	0.428	0.38
0.342	2.895	0.416	0.343
0.392	2.79	0.411	0.364
0.444	2.227	0.393	0.377
0.444	2.963	0.436	0.363
			0.463
