# Supplementary material for: Pectin methylesterase activity is required for RALF1 peptide signalling output
Source: eLife. 2024 Oct 3;13:RP96943. doi: 10.7554/eLife.96943 (PMC11449480; doi:10.7554/eLife.96943)
Supplement: Figure 3—figure supplement 1—source data 1. [file elife-96943-fig3-figsupp1-data1.xlsx]

## Sheet: Sheet1
control	RALF1	RALF34	EGCG	RALF1 + EGCG	RALF34 + EGCG
16.301	32.814	43.769	11.067	18.075	13.925
13.984	30.145	63.249	13.119	20.98	16.783
14.468	29.911	41.159	20.335	24.167	19.255
21.056	22.689	23.786	16.288	18.174	19.562
15.632	55.835	77.501	11.289	25.437	21.416
13.504	45.401	65.786	11.342	20.545	20.704
15.801	39.042	67.245	14.742	17.968	21.176
9.076	46.141	41.972	15.288	25.835	7.461
8.756	49.73	26.133	9.957	22.794	9.301
8.557	45.559	35.556	8.911	22.537	8.65
6.988	46.14	23.917	11.832	19.903	11.031
4.702	46.117	32.494	11.28	24.206	10.763
13.745	39.164	57.414	11.591	22.176	9.976
7.096	30.571	38.786	16.759	29.642	12.899
14.028	32.368	60.146	16.794	19.062	18.422
13.193	31.534	41.019	11.065	15.836	14.56
10.841	32.374	53.67	13.137	15.139	17.329
8.944	33.211	37.846	15.432	17.782	17.78
10.863	39.657	43.509	9.159	20.016	15.487
11.15	47.329	64.361	10.551	23.061	18.893
7.111	42.371	49.232	19.972	18.509	14.043
22.705	54.237	57.714	19.297	21.586	12.667
14.701	48.869	33.735	16.485	10.17	24.796
14.337	46.348	58.195	17.902	17.587	21.839
12.541	49.695	45.694	22.703	23.434	20.677
6.955	59.083	52.763	10.668	24.116	21.993
10.548	27.451	39.543	22.309	20.295	18.08
12.941	35.768	39.364	19.99	19.183	14.973
11.832	36.034	82.762	9.259	21.989	16.748
12.867	39.99	49.678	7.362	20.104	13.897
16.441	26.997	28.183	20.504	19.15	12.536
14.468	42.417	30.089	15.617	18.844	19.166
8.087	36.42	48.682	15.712	21.73	15.866
17.511	41.31	44.645	16.2	20.941	14.205
7.515	43.595	65.084	10.12	24.362	13.273
10.976	48.917	65.264	17.89	25.146	18.036
12.836	36.001	40.645	16.24	17.405	20.351
11.39	39.422	40.738	16.116	14.835	7.645
10.287	50.735	48.815	24.746	13.396	12.996
9.866	42.897	31.361	28.703	22.46	10.647
	32.751	27.422	30.894	20.538	13.313
	43.012	47.894	31.388	10.281	13.025
	34.944	51.568	25.011	18.336	9.003
				18.485	13.341
				14.979	13.916
				12.74
				14.291
