# Supplementary material for: Pectin methylesterase activity is required for RALF1 peptide signalling output
Source: eLife. 2024 Oct 3;13:RP96943. doi: 10.7554/eLife.96943 (PMC11449480; doi:10.7554/eLife.96943)
Supplement: Figure 3—source data 3. [file elife-96943-fig3-data3.xlsx]

## Sheet: Sheet1
control	EGCG	RALF1	EGCG + RALF1
10.452	6.71	38.625	16.934
9.715	6.35	39.745	12.821
9.89	7.434	31.583	13.168
12.287	6.876	36.339	14.369
10.515	6.337	36.434	13.706
10.042	4.945	28.496	10.168
13.808	5.783	27.702	16.058
9.166	9.2	33.35	14.906
13.338	8.896	30.535	14.056
16.296	9.791	32.057	15.968
13.877	12.941	23.948	13.675
14.411	11.231	32.183	15.283
12.373	10.875	36.134	18.563
11.774	9.425	28.97	14.678
11.697	8.037	29.333	13.53
8.997	7.685	26.062	14.422
10.896	9.526	33.525	15.336
10.506	9.903	36.177	12.218
9.034	11.233	22.942	11.678
9.8	11.69	21.34	10.405
9.797	12.075	39.983	11.787
12.49	12.287	24.594	15.838
18.513	10.091	31.08	13.017
17.205	9.718	30.075	11.779
14.444	11.446	24.136	12.909
14.597	14.988	31.306	6.463
11.015	8.602	22.317	6.114
15.47	8.706	24.707	5.98
12.228	6.981	28.878	5.211
11.273	7.555	20.445	5.803
8.546	10.277	28.035	6.913
13.683	8.54	25.826	7.223
13.132	9.696	21.928	8.287
11.333	10.129	24.175	5.552
9.589		17.963	4.471
9.977		16.079	12.617
10.755		25.154	10.805
12.799		27.221	11.851
11.471		24.179	12.072
12.168		35.452	13.594
9.123		31.392	12.928
9.309		26.725	12.261
7.697		30.871	11.785
8.297		28.657	10.951
8.642		28.708	11.948
7.884		37.076	11.18
9.428		34.576	12.166
7.091		29.343	11.251
7.708		40.987	10.87
6.909		32.586	12.995
4.7		24.812	15.162
5.471			10.077
4.469			11.569
5.027			10.296
7.218			11.054
			13.178
			11.897
			7.84
			8.06
			9.532
			11.297
			10.468
			8.662
			10.071
			13.722
			11.554
