# Supplementary material for: Pectin methylesterase activity is required for RALF1 peptide signalling output
Source: eLife. 2024 Oct 3;13:RP96943. doi: 10.7554/eLife.96943 (PMC11449480; doi:10.7554/eLife.96943)
Supplement: Figure 3—source data 4. [file elife-96943-fig3-data4.xlsx]

## Sheet: Sheet1
FER::FER-GFP		FER::FER-GFP x PMEI-OE
control	RALF1	control	RALF1
27.855	53.031	33.32	26.146
33.195	43.393	14.841	24.359
34.755	51.926	20.048	23.197
21.33	34.405	26.181	28.486
20.13	61.123	29.913	40.769
17.311	37.647	25.186	44.776
24.591	38.021	32.66	42.158
25.548	35.261	23.835	40.562
26.519	35.413	17.904	39.075
25.492	42.264	47.156	34.467
7.731	48.603	35.932	38.625
8.002	44.639	33.661	33.522
9.223	48.281	19.301	29.446
9.096	45.888	12.688	29.655
18.122	45.771	13.354	46.824
15.082	59.46	16.433	39.996
14.933	54.217	22.307	43.363
12.383	60.142	28.256	45.578
10.414	53.603	30.563	42.433
12.687	53.887	40.388	23.597
23.019	49.476	45.29	37.162
20.98	28.087	15.303	13.206
22.83	34.431	16.057	11.287
15.214	39.592	18.096	10.688
11.743	34.691	18.274	10.824
15.181	43.304	17.874	12.669
12.247	36.557	24.672	10.965
22.528	41.796		8.67
13.359	40.548		32.546
13.142	36.228		36.54
12.947	35.3		38.508
13.454	41.947		14.046
20.934	47.05		24.29
16.612	38.793		14.955
	50.041
	49.098
	41.358
	40.675
	32.348
	42.842
	39.436
