# Supplementary material for: Pectin methylesterase activity is required for RALF1 peptide signalling output
Source: eLife. 2024 Oct 3;13:RP96943. doi: 10.7554/eLife.96943 (PMC11449480; doi:10.7554/eLife.96943)
Supplement: Figure 4—figure supplement 1—source data 2. [file elife-96943-fig4-figsupp1-data2.xlsx]

## Sheet: Sheet1
control	OG10-15	OG25-50	RALF1	OG10-15 + RALF1	OG25-50 + RALF1
16.2518	21.0062	16.8453	48.1742	19.7743	25.8355
14.1455	19.6262	17.1608	46.1287	24.186	24.4845
12.8884	18.3986	16.4294	50.1212	19.4208	25.3432
11.7816	18.2372	14.7698	61.4356	20.476	21.9462
14.5605	14.6902	14.542	52.6018	23.7	21.5475
15.5688	14.9088	11.6233	53.5425	18.318	15.5428
14.4668	13.8453	12.4595	44.0418	19.3913	21.1537
11.0213	17.2455	8.5298	45.037	22.8118	15.1012
13.0752	15.1526	10.806	48.9768	21.0256	19.4593
13.3915	14.7625	14.0372	46.958	21.906	19.4162
		16.4075	49.237
