# Supplementary material for: Pectin methylesterase activity is required for RALF1 peptide signalling output
Source: eLife. 2024 Oct 3;13:RP96943. doi: 10.7554/eLife.96943 (PMC11449480; doi:10.7554/eLife.96943)
Supplement: Figure 4—figure supplement 2—source data 2. [file elife-96943-fig4-figsupp2-data2.xlsx]

## Sheet: Sheet1
control	RALF1	RALF1-KR
0.45125	2.75367	0.4768
0.428	2.811	0.4415
0.473	2.4	0.48175
0.458833	2.8506	0.45925
0.432667	2.404	0.39275
0.415429	2.512	0.539
0.4796	2.303	0.3595
0.4746	1.90775	0.40775
0.573143	1.8198	0.5358
	2.1225	0.476167
	2.1606	0.528833
	3.07717
