# Supplementary material for: Pectin methylesterase activity is required for RALF1 peptide signalling output
Source: eLife. 2024 Oct 3;13:RP96943. doi: 10.7554/eLife.96943 (PMC11449480; doi:10.7554/eLife.96943)
Supplement: Figure 4—figure supplement 2—source data 3. [file elife-96943-fig4-figsupp2-data3.xlsx]

## Sheet: Sheet1
control	RALF1	RALF1-KR
12.33	23.068	25.83
13.667	26.082	22.082
14.957	34.386	17.378
13.586	29.243	20.235
10.977	26.054	20.782
21.567	35.048	20.199
24.365	27.484	17.137
15.983	34.752	12.246
18.639	26.348	11.816
17.37	38.067	15.889
13.062	34.748	23.905
14.474	28.803	11.105
13.543	37.007	11.118
14.176	32.959	18.502
15.62	30.332	19.936
14.765	32.7	16.06
13.728	31.884	17.145
29.742	36.912	16.562
14.645	27.648	13.466
16.396	34.748	13.343
16.379	32.79	21.202
13.234	38.88	25.613
20.566	40.219	21.767
13.829	38.757	13.832
14.931	46.081	13.191
13.975	33.12	13.733
23.531	29.242	11.827
22.309	35.063	18.697
18.27	28.896	16.539
18.406	35.766	16.877
15.273	33.031	16.955
17.128	23.672	18.462
15.402	34.637	20.014
13.368	31.198	19.259
15.805	30.119	18.085
14.748	29.843	15.841
13.921	26.184	14.186
14.029	30.36	12.048
24.214	20.582	14.675
21.207	28.688	11.969
17.336	25.677	22.691
13.657	22.904	15.614
16.852	26.321	19.082
15.835	27.451	16.749
16.388	34.781	16.943
16.598	29.887
17.435	35.193
	34.048
	31.794
	28.957
