# Supplementary material for: Pectin methylesterase activity is required for RALF1 peptide signalling output
Source: eLife. 2024 Oct 3;13:RP96943. doi: 10.7554/eLife.96943 (PMC11449480; doi:10.7554/eLife.96943)
Supplement: Figure 4—source data 1. [file elife-96943-fig4-data1.xlsx]

## Sheet: Sheet1
control	0.5 µM RALF1	1 µM RALF1	1.5 µM RALF1	OG25-50	0.5 µM RALF1 + OG25-50	1 µM RALF1 + OG25-50	1.5 µM RALF1 + OG25-50
20.005	38.714	32.714	69.484	17.423	24.588	28.615	35.264
27.927	43.127	26.325	70.466	19.81	24.231	27.135	67.161
16.594	36.945	67.517	54.197	15.924	23.205	23.003	61.995
15.779	32.023	67.814	68.335	14.574	27.638	23.251	54.275
14.334	58.26	31.047	75.497	17.135	26.114	23.442	53.286
11.242	51.483	24.147	56.259	23.418	26.83	27.678	58.784
10.296	44.773	54.275	50.715	23.864	25.138	45.906	61.599
17.164	26.043	61.648	51.577	26.505	25.86	34.359	44.995
20.573	28.9	52.275	42.503	18.732	30.349	25.468	44.414
18.223	56.852	34.32	41.656	21.449	25.109	25.883	31.607
9.764	42.849	58.839	40.832	21.355	21.689	32.819	33.379
14.481	43.607	30.929	54.428	22.309	27.03	28.944	46.602
18.221	57.942	61.536	37.864	14.469	24	39.168	30.153
20.6	39.928	49.94	34.495	16.44	18.722	28.278	75.44
14.09	31.803	47.498	63.795	18.747	20.38	18.508	39.847
17.936	42.696	51.447	47.551	16.958	18.03	17.252	41.886
18.58	59.315	40.367	41.885	14.525	18.284	26.268	67.589
19.285	48.923	55.789	56.94	17.866	17.673	27.429	31.396
17.108	42.969	36.315	53.858	18.835	23.44	30.223	42.835
24.237	26.847	69.77	63.193	15.797	25.398	29.101	34.274
13.47	29.71	59.101	58.97	13.36	25.176	21.287	41.103
15.939	34.036	41.308	66.842	12.805	25.571	19.983	38.486
13.245	33.022	66.799	45.26	20.808	20.739	32.509	34.073
13.856	37.218	40.893	53.05	16.933	24.892	28.254	31.779
10.52	42.128	45.517	52.198	16.652	27.846	33.803	31.455
10.494	55.197	61.704	46.588	19.653	22.833	27.176	34.764
13.731	61.722	56.066	34.483	12.945	25.879	27.374	52.412
15.095	27.826	50.137	64.366	14.298	25.63	22.779	48.957
16.342	29.865	73.879	54.87	15.557	25.388	23.62	36.965
16.322	34.13	27.073	41.671	18.501	25.496	20.38	68.903
18.692	46.73	48.59	50.121	14.276	22.356	22.851	40.558
9.294	37.071	49.105	73.344	21.295	22.728	28.141	48.681
11.937	45.633	41.323	50.707	14.374	26.895	37.894	50.459
12.133	37.135		51.313	15.918	23.545	19.809	50.804
9.475	46.055		47.72	17.935	18.438	44.323	63.489
	40.793		59.476	19.875	22.715	33.325	67.799
	44.543		65.168	12.414		45.239	39.908
	53.968			13.664			52.977
							38.698
							29.911
